# Supplementary material for: Biopolymer capsules bearing polydiacetylenic vesicles as colorimetric sensors of pH and temperature
Source: Royal Society of Chemistry journal article supplement (doi:10.1039/c0sm01243b), 2011-01-01
Supplement: c0sm01243b.pdf [file c0sm01243b.pdf]

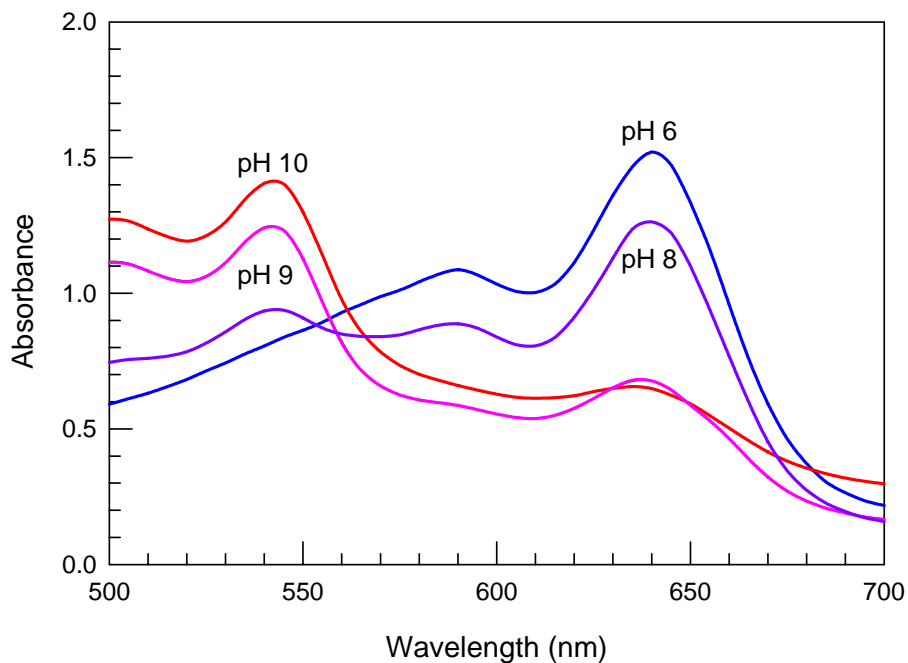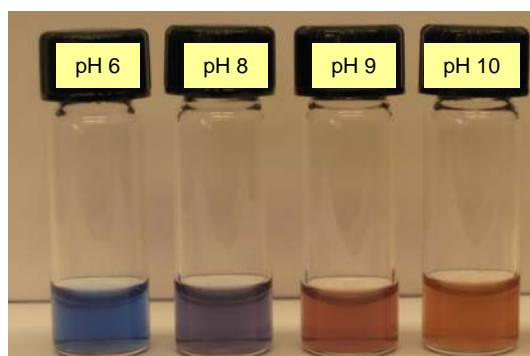

**Figure S1.** UV-Vis spectra (top) and photographs (bottom) of PDA vesicle solutions at different pH. The solutions each contain 0.33 mM of the diacetylenic amphiphile and the solution pH was varied by using phosphate buffers in different proportions.
